# Supplementary material for: Synthesis and in situ ion irradiation of A-site deficient zirconate perovskite ceramics
Source: Royal Society of Chemistry journal article supplement (doi:10.1039/d0ta05255h), 2020-01-01
Supplement: d0ta05255h1.pdf [file d0ta05255h1.pdf]

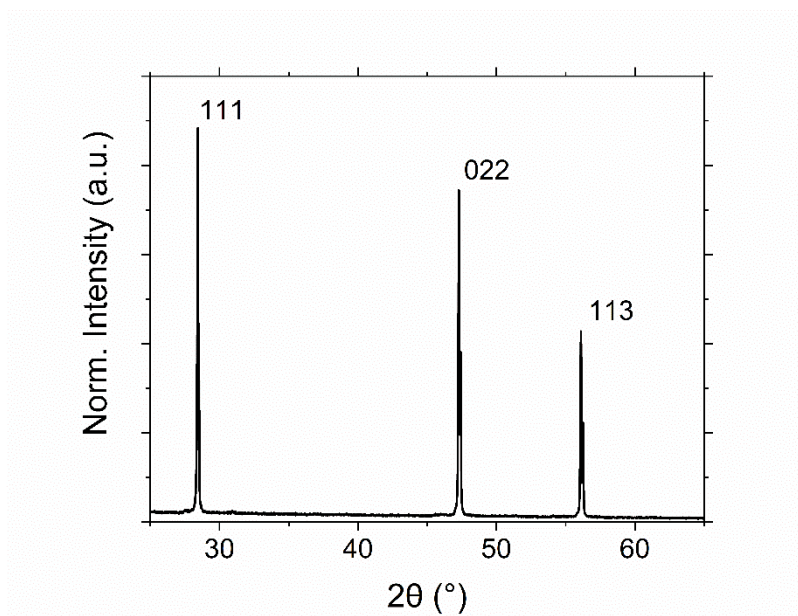

Supplementary Figure 1. XRD trace of the Si metal 640e NIST standard reference used for XRD calibration.

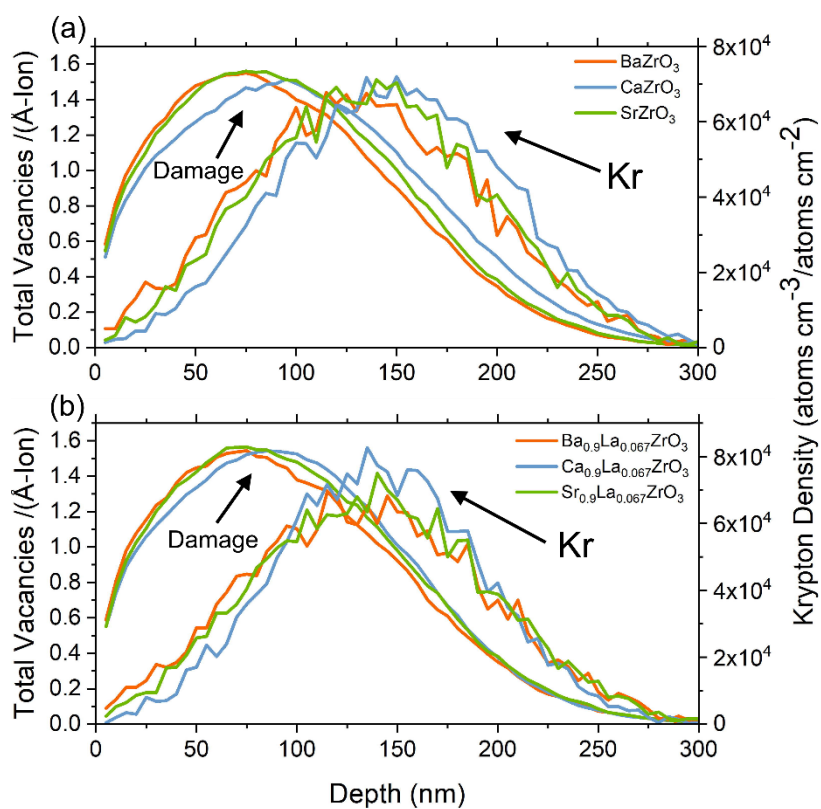

Supplementary Figure 2. SRIM profiles for (a) undoped and (b) doped  $\text{Ba}_{1-x}\text{La}_x\text{ZrO}_3$ ,  $\text{Sr}_{1-x}\text{La}_x\text{ZrO}_3$  and  $\text{Ca}_{1-x}\text{La}_x\text{ZrO}_3$  samples.

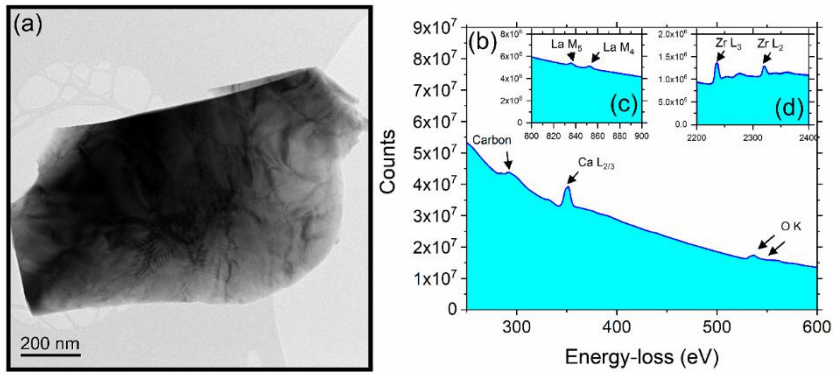

Supplementary Figure 3. (a) TEM micrograph of a grain of  $\text{Ca}_{0.9}\text{La}_{0.067}\text{ZrO}_3$  (b) EELS spectra of the 250-600 eV loss region with the O K-edge and Ca  $L_{2/3}$  edges labelled (c) EELS spectra of the 800-900 eV loss region with the La  $M_{4/5}$  edges labelled and (d) EELS spectra of the 2200-2400 eV loss region with the Zr  $L_{2/3}$  edges labelled.

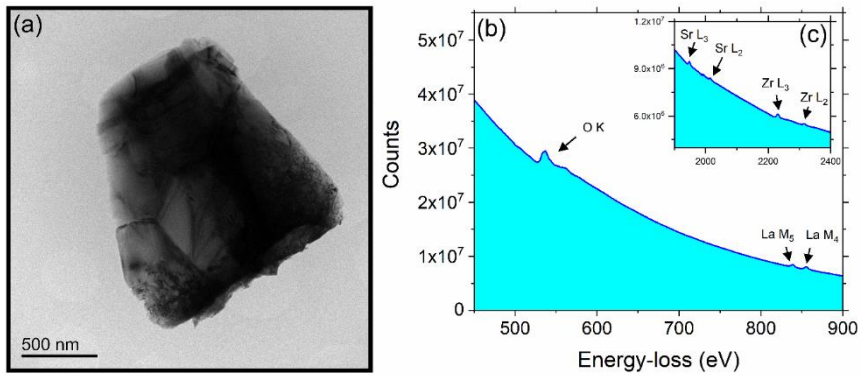

Supplementary Figure 4. (a) TEM micrograph of a grain of  $\text{Sr}_{0.9}\text{La}_{0.067}\text{ZrO}_3$  (b) EELS spectra of the 450-900 eV loss region with the O K-edge and La  $M_{4/5}$  edges labelled (c) EELS spectra of the 1900-2400 eV loss region, with Sr  $L_{2/3}$  edges and Zr  $L_{2/3}$  edges labelled.

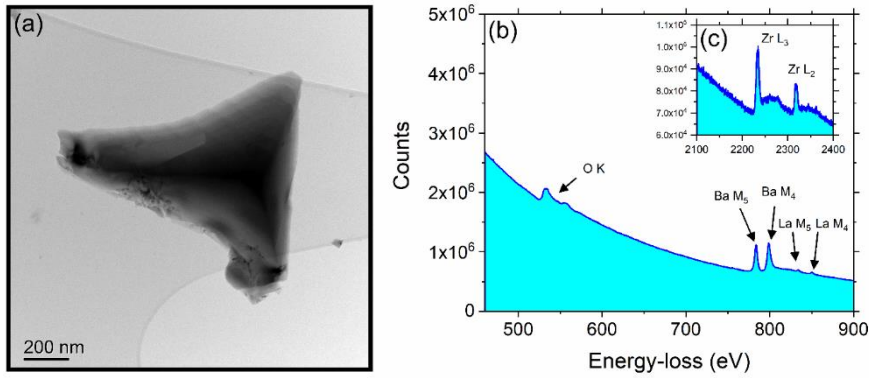

Supplementary Figure 5. (a) TEM micrograph of a grain of  $\text{Ba}_{0.8}\text{La}_{0.053}\text{ZrO}_3$  (b) EELS spectra of the 460-900 eV loss region with the O K-edge, Ba  $M_{4/5}$  edges and La  $M_{4/5}$  edges labelled (c) EELS spectra of the 2100-2400 eV loss region with the Zr  $L_{2/3}$  edges labelled.
